# Supplementary material for: MicroRNAs Associated with Metastatic Prostate Cancer
Source: PLoS One. 2011 Sep 30;6(9):e24950. doi: 10.1371/journal.pone.0024950 (PMC3184096; doi:10.1371/journal.pone.0024950)
Supplement: Table S5 — Lists of genes associated with (i) up-regulated mRNAs/down-regulated miRNAs and (ii) down-regulated mRNAs/up-regulated miRNAs. (XLS) [file pone.0024950.s005.xls]

## Sheet: up-reg miRNA & down-reg mRNA
Supplementary Table S5a. Lists of genes associated with down-regulated mRNAs/up-regulated miRNAs.
Gene Symbol
AGT
AHR
ATRNL1
AYTL1
B4GALT6
C10orf81
C20orf112
C3orf15
C3orf30
CALCA
CDH10
CHST9
CPNE8
DDIT4L
DEFA6
DIAPH2
DLEC1
DPYSL5
ECM2
EFEMP1
ENTPD3
EPSTI1
FAM81B
FGF14
FRAS1
GALNT13
GJB5
GNG3
GPR110
GRM8
HLA-DQB2
HOXD1
HS6ST3
HYAL1
IL13
KCNH6
KIAA1462
KLHL1
MAP1LC3A
MSR1
MX1
NID2
NUDT13
NUDT8
PCDH8
PDE4A
PDGFRB
PDGFRL
PHF15
PIGW
PKD2L2
PLCH2
PPARGC1B
PPEF2
PPFIA2
PRDM16
PRKG2
RFTN1
RFXDC1
RGS1
RGS17
RNF17
SEMA3A
SEMA3C
SERPINB5
SERTAD4
SIGLEC10
SLC3A1
SLC40A1
SOX2
SP5
SPAG9
SPRR1A
ST3GAL5
SULF2
SYN2
TAC1
TM4SF20
TMEM142C
TMEM178
TRIM7
TRPA1
TSGA10IP
XKRX
ZMAT4

## Sheet: down-reg miRNA & up-reg mRNA
Supplementary Table S5b. Lists of genes associated with up-regulated mRNAs/down-regulated miRNAs.
Gene Symbol
ALDH1A1
BDH2
C10orf63
C14orf54
C19orf57
C6orf105
CHRNA1
CLDN12
CLIC3
CNTFR
CSTA
FOS
FSCN1
GABRA2
GPR88
HAVCR2
HOXD10
HPSE2
HSPH1
HTR3C
IL24
KCNJ8
KLF7
KRT19
KRT27
KSR1
L3MBTL4
LAMB4
LPL
MAP2
MYBPC1
MYO16
NAV3
NBL1
NGFRAP1L1
PDE4B
PFKFB4
PITPNC1
PLA2G12B
PNCK
PTHR2
RASAL2
RHOJ
RLN1
SEMA7A
SEPT1
SFXN3
SHC4
ST3GAL4
TEX13A
TITF1
TLR2
TMEM132B
USP2
VEGFA
VIM
VWF
ZNF533
